# Supplementary material
Source: MDPI journal article supplement (https://www.mdpi.com/2073-8994/14/10/2163)
Supplement: s1 [file s1]

Archive with 2 entries (2 files):
- Supplementary file S1.xlsx
- Supplementary file S2.pdf
