# Supplementary material
Source: MDPI journal article supplement (https://www.mdpi.com/2073-8994/14/10/2163)
Supplement: s1 [file s1 › Supplementary file S1.xlsx]

## Sheet: Handedness at the 16-22 Euros
2022	Spain	Croatia	Norway	Slovenia	Germany	Portugal	Sweden	Hungary	Iceland	Denmark	Serbia	France	Slovakia	Belarus	Austria	Czech Republic	Russia	North Macedonia	Netherlands	Montenegro	Ukraine	Poland	Bosnia and Herzegovina	Lithuania
1	PEREZ DE VARGAS MORENO	MARIC Marino	AGA ECK Vetle	BAZNIK Joze	GOLLA Johannes	DUARTE BRITO Gilberto	JOHANNESSON Peter	SIPOS Adrián	GUSTAVSSON Björgvin Pall	LANDIN JACOBSEN Niklas	BOMASTAR Milan	LENNE Yanis	PAUL Teodor	MATSKEVICH Ivan	HERMANN Alexander	MRKVA Tomas	SANTALOV Dmitrii	VELKOVSKI Martin	STAVAST Ivar	MATOVIC Nikola	TEREKHOV Anton	KORNECKI Mateusz	BOJIC Nebojsa	VIRBAUSKAS Zanas Gabrielius
2	GURBINDO MARTINEZ Eduardo	GADŽA Ante	SAGOSEN Sander	SKUBE Stas	WIENCEK Patrick	ITURRIZA ALVAREZ Victor Manuel	CARLSBOGARD Jonathan	TOPIC Petar	SMARASON Janus Dadi	LANDIN JACOBSEN Magnus	BORZAS Uros	MINNE Aymeric	HRUSCAK Patrik	KULESH Uladzislau	BOZOVIC Janko	HRSTKA Jakub	VOROBEV Valentin	STOILOV Stojanche	KOOIJ Lars	VUJOVIC Filip	ZALEVSKYI Vladyslav	DASZEK Michal	VUKSIC Milan	MALASINSKAS Aidenas
3	PECINA TOME Inaki	PESIC Ivan	BARTHOLD Sebastian	BLAGOTINSEK Blaz	HEYMANN Sebastian	MARTINS SOARES Miguel	MELLEGARD Emil	BÓKA Bendegúz	PALMARSSON Aron	JAKOBSEN Emil	SRETENOVIC Stevan	RICHARDSON Melvyn	MACHÁC Šimon	KULAK Artsiom	WEBER Robert	BECVAR Roman	KOTOV Alexander	KUZMANOSKI Cvetan	BLAAUW Niko	CAVOR Stefan	BUINENKO Evgeniy	JEDRASZCZYK Piotr	PERIC Josip	BABARSKAS Povilas
4	MAQUEDA PENO Jorge	IVIC Sime	ØVERJORDET Sander Andreassen	HENIGMAN Nik	KÖSTER Julian	GASPAR Manuel	DARJ Max	LIGETVÁRI Patrik	KRISTJÁNSSON Viggo	LAUGE SCHMIDT Rasmus	DJUKIC Darko	MEM Dika	BRIATKA Martin	ASTRASHAPKIN Aleh	POSCH Fabian	JURKA Miroslav	OSTASHCHENKO Roman	GJORGIEV Igor	BOURGET Florent	LAZOVIC Vuk	KASAI Oleksandr	OLEJNICZAK Michal	HERCEG Mirko	PETREIKIS Benas
5	SOLE SALA Ferran	CUPIC Ivan	ØVERBY Petter	MARGUC Gasper	M'BENGUE Djibril	HERNANDEZ ZULUETA Angel	PETTERSSON Daniel	SZÉKELY Márton	ELISSON Bjarki Mar	JENSEN Magnus Saugstrup	PESIC Zivan	TOURNAT Nicolas	PROKOP Jakub	NIKANOVICH Yauheni	FRIMMEL Sebastian	PIROCH Tomas	KORNEV Dmitry	TALESKI Filip	STEINS Luc	CEPIC Radojica	TIUTIUNNYK Dmytro	KOMARZEWSKI Krzysztof	BURIC Senjamin	RASIMAS Vilius
6	FIGUERAS TREJO Adrian	MUSA Željko	SAEVERAAS Kristian Skinstad	JANC Blaz	WEBER Philipp	SILVA SOUSA MARTINS Rui	PALICKA Andreas	MIKLER Roland	JÓNSSON Elvar	SVAN Lasse	RADIVOJEVIC Bogdan	GERARD Vincent	POTISK Martin	SALDATSENKA Viachaslau	DICKER Daniel	KASPAREK Stanislav	DZEMIN Evgenij	TOMOVSKI Martin	BENGHANEM Samir	VUJOVIC Branko	TILTE Oleksandr	WALCZAK Patryk	KLIS Edin	SMANTAUSKAS Gytis
7	CAÑELLAS REIXACH Joan	CINDRIC Luka	THORSTEINSEN TOFT Erik	DOLENEC Jure	HÄFNER Kai	SALINA AMADOR Daymaro	PETTERSSON Fredric	ROSTA Miklós	KRISTJANSSON Gisli Thorgeir	MØLLER Kevin	PECHMALBEC Dragan	KARABATIC Nikola	URBAN Tomas	KRYVENKA Uladzislau	HERBURGER Lukas	REICHL Vit	ERMAKOV Aleksandr	MIRKULOVSKI Filip	SCHAGEN Bobby	VUJOVIC Milos	KRAVCHENKO Eduard	BIS Bartlomiej	BURIC Benjamin	BABARSKAS Gerdas
8	CASADO MARCELO Agustín	SUNJIC Mate	TÖNNESEN Kent Robin	POTEKO Vid	SCHILLER Marcel	ROCHA Tiago	PELLAS Lucas	MATHE Dominik	GÍSLASON Ýmir	MØLLGAARD JENSEN Henrik	ILIC Vanja	FABREGAS Ludovic	DURIS Lubomir	YURYNOK Andrei	ZEINER Gerald	BABAK Tomas	VERESHCHAGIN Andrei	CHANEVSKI Gradimir	STEINS Ivo	SIMIC Nebojsa	DONTSOV Vladyslav	SICKO Szymon	TERZIC Mirsad	SIMENAS Lukas
9	GARCIA ROBLEDO Antonio Jesus	GRAHOVAC Nikola	BJÖRNSEN Kristian	CEHTE Nejc	WOLFF Andreas	BRANQUINHO Diogo	LAGERGREN Albin	RODRÍGUEZ ALVAREZ Pedro	GUDMUNDSSON Olafur Andres	MENSAH LARSEN Mads	KUKIC Lazar	PARDIN Wesley	PECHY Lukas	ZAITSAU Viktar	ZIVKOVIC Boris	CIP Tomas	SHISHKAREV Daniil	KUZMANOVSKI Filip	ADAMS Jasper	SIMOVIC Nebojsa	HORIHA Dmytro	PIETRASIK Ariel Piotr	FALJIC Adin	PLETA Skirmantas
10	ARIÑO BENGOECHEA Aitor	LUCIN Tin	GULLERUD Magnus	KODRIN Tilen	KÜHN Julius	CAVALCANTI Alexandre	GOTTFRIDSSON Jim	BÁNHIDI Bence	MAGNUSSON Ómar Ingi	TOFT HANSEN Henrik	SOTIC Mladen	DESCAT Hugo	KOVACECH Marek	KARALEK Artsem	DOKNIC Golub	PETROVSKY Leos	SOROKA Igor	KOSTESKI Nenad	SMIT Alec	VUJOVIC Stevan	BURZAK Ivan	BECKMAN Melwin	KARACIC Ivan	MORKUNAS Giedrius
11	GUARDIOLA VILLAPLANA Gedeon	JAGANJAC Halil	O'SULLIVAN Christian	ZARABEC Miha	MERTENS Lukas	AREIA RODRIGUES Antonio	PERSSON Linus	BUJDOSÓ Bendegúz	HALLGRÍMSSON Viktor	HANSEN Mikkel	MARSENIC Mijajlo	PORTE Valentin	HNIDAK Marek	VAILUPAU Mikita	HÄUSLE Ralf Patrick	VANCO Marek	VRACHEVICH Radomir	GEORGIEVSKI Goce	SMITS Kay	SEVALJEVIC Vasko	BLYZNIUK Illia	PILITOWSKI Maciej	PRCE Nikola	DRABAVICIUS Valdas
12	TARRAFETA SERRANO Ian	RAVNIC Valentino	REINKIND Harald	SOKOLIC Tilen	ERNST Simon	ALVES Miguel	EDVARDSSON Jonathan	SZITA Zoltan	VIÐARSSON Elliði	HANSEN Johan a Plogv	ORBOVIC Milos	KOUNKOUD Benoit	SMETANKA Tomas	SAMOILA Kiryl	RANFTL Julian	KLIMA Matej	ANDREEV Pavel	KRSTEVSKI Goran	FALKE Tommie	BOŽOVIC Miloš	TURCHENKO Ihor	SYPRZAK Kamil	VRANJES Vladimir	JOVAISAS Deividas
13	SANCHEZ-MIGALLON NARANJO	MARTINOVIC Ivan	BERGERUD Torbjoern Sittrup	MAKUC Domen	STEINERT Christoph	FERNANDES Leonel	THULIN Tobias	ANCSIN Gábor	ARNARSSON Arnar Freyr	ANDERSSON Lasse Bredekjaer	RADOVIC Danilo	NAHI Dylan	KALAFUT Dominik	UDAVENIA Matsvei	DAMBÖCK Eric	PATZEL Vojtech	KIREEV Victor	PESHEVSKI Zharko	JANSEN Tom	LASICA Marko	MINOTSKYI Taras	MORYTO Arkadiusz	HAMIDOVIC Dino	ANTANAVICIUS Karolis
14	MARQUEZ COLOMA Jose Maria	ŠIPIC Marin	SOLSTAD Thomas Alfred	MACKOVSEK Borut	KASTENING Timo	SALVADOR Salvador	BERGENDAHL Oscar	BODO Richard	GUDJONSSON Sigvaldi Bjørn	HOLM Jacob Tandrup	MILOSAVLJEVIC Marko	MONAR Théo	SLANINKA Martin	BOKHAN Viachaslau	BILYK Mykola	SOLÁK Dominik	ZHITNIKOV Dmitry	MADZOVSKI Bojan	DE KNEGT Rene	VUJACIC Risto	KOMOK Gennadiy	KRAJEWSKI Przemyslaw	LUKIC Marko	VIRBAUSKAS Deividas
15	HERNANDEZ FERRER Sergey	GLAVAŠ Filip	GULLIKSEN Kevin Maageroe	SUHOLEZNIK Matic	KLIMPKE Till	CAPDEVILLE Gustavo	WALLINIUS Karl	LEKAI Mate	KRISTJÁNSSON Kristján Örn	GIDSEL Mathias	CUPARA Vladimir	KONAN Karl	ZERNOVIC Marian	GAYDUCHENKO Vadim	WAGNER Tobias	MIZERA Šimon	KAMENEV Nikita	SERAFIMOV Martin	VAN LEEUWEN Thijs	ANDJELIC Bozo	ILCHENKO Dmytro	GEBALA Maciej	KESKIC Enes	STANKEVICIUS Tadas
16	ODRIOZOLA YEREGUI Kauldi	JELINIC Marin	CHRISTOFFERSEN BLONZ Alexander	KASTELIC Urh	WITZKE Luca	MAGALHÃES Fabio Ramos	CHRINTZ Valter	HANUSZ Egon	ÞORKELSSON Orri Freyr	HALD JENSEN Simon	IVANISEVIC Tibor	BRIET Thibaud	MIKITA Jakub	ALIOKHIN Mikalai	HUTECEK Lukas	FRANC Václav	KOSOROTOV Sergei Mark	MISHEVSKI Marko	BAIJENS Dani	GRBOVIC Nemanja	ARTEMENKO Dmytro	ZEMBRZYCKI Mateusz	DRAGNIC Vlado	DUMCIUS Mindaugas
% left-handed	0.3125	0.25	0.3125	0.25	0.25	0.1875	0.25	0.25	0.25	0.25	0.1875	0.3125	0.25	0.25	0.25	0.25	0.1875	0.25	0.25	0.25	0.1875	0.1875	0	0.1875
2020	Spain	Croatia	Norway	Slovenia	Germany	Portugal	Sweden	Hungary	Iceland	Denmark	Serbia	France		Belarus	Austria	Czech Republic	Russia	North Macedonia	Netherlands	Montenegro	Ukraine	Poland	Bosnia and Herzegovina		Switzerland	Latvia
1	PEREZ DE VARGAS MORENO	MARIC Marino	NIKOLAISEN SVEGÅRD Tom Kåre	BLAGOTINSEK Blaz	BITTER Johannes	QUINTANA BRAVO Alfredo	DARJ Max	SIPOS Adrian	GUSTAVSSON Björgvin Pall	LANDIN JACOBSEN Niklas	MOSIC Ivan	REMILI Nedim		MATSKEVICH Ivan	BAUER Thomas	MRKVA Tomas	ZABOLOTIN Denis	MITREVSKI Nikola	RAVENSBERGEN Bart	VUJOVIC Filip	TEREKHOV Anton	KORNECKI Mateusz	GRAHOVAC Nebojsa		SCHMID Andre	VERSAKOVS Maris
2	MAQUEDA PENA Jorge	DUVNJAK Domagoj	SAGOSEN Sander	HENIGMAN Nik	GENSHEIMER Uwe	PORTELA Pedro	HENNINGSSON Philip	BALOGH Zsolt	KRISTJANSSON Kari Kristjan	KIRKELOKKE Niclas Vest	VUJIC Stefan	LAGARDE Romain		BROUKA Ivan	BOZOVIC Janko	HRSTKA Jakub	SANTALOV Dmitrii	MANASKOV Dejan	LEENDERS Toon	GLENDZA Aleksandar	BUINENKO Evgeniy	KRAJEWSKI Przemyslaw	OVCINA Alen		MEISTER Lucas	STRAZDINS Uvis
3	FERNANDEZ PEREZ Angel	HRSTIC Matej	ØVERJORDET Sander Andreassen	MARGUC Gasper	WIENCEK Patrick	FERRAZ Joao Miguel	TOLLBRING Jerry	LIGETVÁRI Patrik	PALMARSSON Aron	BRAMMING Magnus Grubb	SRETENOVIC Stevan	PRANDI Elohim		KULESH Uladzislau	WEBER Robert	BECVAR Roman	SHISHKAREV Daniil	VELKOVSKI Martin	SLUIJTERS Iso	BAKIC Aleksandar	AKIMENKO Andrii	SICKO Szymon	PERIC Josip		RUBIN Lenny	JURDZS Aivis
4	ENTRERRIOS RODRIGUEZ Raul	STEPANCIC Luka	ÖVERBY Petter	JANC Blaz	REICHMANN Tobias	MARTINS SOARES Miguel	PETTERSSON Daniel	SZÉKELY Márton	ELISSON Bjarki Mar	LAUGE SCHMIDT Rasmus	CRNOGLAVAC Nikola	RICHARDSON Melvyn		SHYLOVICH Siarhei	BRANDFELLNER David	JURKA Miroslav	KOVALEV Dmitry	STOILOV Stojanche	STEINS Luc	CAVOR Stefan	SHEVELEV Olexandr	MAJDZINSKI Maciej	BURIC Senjamin		SVAJLEN Michal	KRISTOPANS Dainis
5	DUJSHEBAEV DOVICHEBAEVA Alex	HORVAT Zlatko	SAEVERAAS Kristian Skinstad	DOLENEC Jure	PEKELER Hendrik	SILVA SOUSA MARTINS Rui	PALICKA Andreas	BÓKA Bendegúz	SIGURDSSON Gudjon Valur	ZACHARIASSEN Anders	DJUKIC Milan	MEM Dika		PUKHOUSKI Barys	POSCH Fabian	HORAK Pavel	SHKURINSKIY Alexsander	LAZAROV Kiril	BENGHAMEN Samir	LAZOVIC Vuk	DENYSOV Zakhar	LANGOWSKI Antoni	PANIC Marko		LIER Marvin	KUKSA Edgars
6	SARMIENTO MELIAN Daniel	SARAC Josip	JOENDAL Magnus	CINGESAR Darko	WEBER Philipp	SALINA AMADOR Daymaro	JEPPSSON Simon	GYORI Mátyás	GISLASON Ymir Örn	SAUGSTRUP JENSEN Magnus	PESIC Zivan	TOURNAT Nicolas		SALDATSENKA Viachaslau	FRIMMEL Sebastian	GALIA Martin	GORBOK Sergei	TALESKI Filip	SCHAGEN Bobby	VUJOVIC Branko	DOROSHCHUK Dmytro	PILITOWSKI Maciej	MANDIC Igor		SIDOROWICZ Roman	ARAJS Oskars
7	CORRALES RODAL Rodrigo	KARACIC Igor	BJÖRNSEN Kristian	CEHTE Nejc	MICHALCZIK Marian	GOMES Humberto	APPELGREN Mikael	MIKLER Roland	GUDMUNDSSON Olafur Andres	GREEN Jannick	RADIVOJEVIC Bogdan	GERARD Vincent		NIKULENKAU Dzmitry	DICKER Daniel	KASPAREK Stanislav	ATMAN Pavel	RISTOVSKI Borko	STEINS Ivo	MIJUSKOVIC Mile	TILTE Oleksandr	SYPRZAK Kamil	BURIC Benjamin		VON DESCHWANDEN Lukas	PURINS Raitis
8	AGUINAGALDE AKIZU Julen	MUSA Zeljko	GULLERUD Magnus	KODRIN Tilen	HÄFNER Kai	ROCHA Tiago	PELLAS Lucas	NAGY Bence	PETERSSON Alexander	LINDBERG Hans	ILIC Nemanja	KARABATIC Nikola		SHUMAK Viachaslau	HERBURGER Lukas	BABAK Tomas	KALARASH Gleb	MARKOSKI Nikola	SCHOENAKER Robin	RADOVIC Mirko	HORIHA Dmytro	MORYTO Arkadiusz	HASELJIC Ibrahim		RAEMY Nicolas	KREICBERGS Nils
9	SOLE SALA Ferran	MAMIC Marko	JOHANNESSEN Goeran Soegaard	ZARABEC Miha	WOLFF Andreas	BORGES HERNANDEZ Alexis	LAGERGREN Albin	ROSTA Miklós	HALLGRIMSSON Viktor Gisli	TOFT HANSEN Rene	PUSICA Miljan	GREBILLE Mathieu		YURYNOK Andrei	ZEINER Gerald	CIP Tomas	DIBIROV Timur	KUZMANOVSKI Filip	VERSTEIJNEN Niels	SIMIC Nebojsa	KOZAKEVYCH Artem	JAROSIEWICZ Piotr	TERZIC Mirsad		PORTNER Nikola	ERMANIS Andis
10	FIGUERAS TREJO Adrian	CINDRIC Luka	O'SULLIVAN Christian	FERLIN Klemen	KÜHN Julius	BRANQUINHO Diogo	GOTTFRIDSSON Jim	MATHE Dominik	GUNNARSSON Arnor Tor	MØLLGAARD JENSEN Henrik	ILIC Vanja	GENTY Yann		BARANAU Maksim	ZIVKOVIC Boris	VANCO Marek	SOROKA Igor	TANKOSKI Mario	SMITS Kay Kirsten Evert	KANKARAS Branko	ZHUK Ievgen	KONDRATIUK Adrian	KARACIC Ivan		RÖTHLISBERGER Samuel	DUDE Ingars
11	CAÑELLAS REIXACH Joan	MATANOVIC Vlado	TANGEN Eivind	HORZEN Kristjan	BÖHM Fabian	CAVALCANTI Alexandre	ARNESSON Linus	BANHIDI Bence	ARNARSSON Arnar Freyr	MENSAH LARSEN Mads	NIKOLIC Zoran	ABALO Luc		LUKYANCHUK Yury	EICHBERGER Thomas	ZDRAHALA Ondrej	KOTOV Alexander	GEORGIEVSKI Goce	ADAMS Jasper	VUJOVIC Stevan	CHYCHYKALO Roman	GEBALA Maciej	PRCE Nikola		KÜTTEL Dimitrij	LILIENFELDS Girts
12	MORROS DE ARGILA Viran	MANDIC David	REINKIND Harald	ZABIC Igor	KOHLBACHER Jannik	AREIA RODRIGUES Antonio	NILSSON Andreas	SZITA Zoltan	GUDJONSSON Sigvaldi Björn	HANSEN Mikkel	KUKIC Lazar	SORHAINDO Cedric		PADSHYVALAU Aliaksandr	BILYK Nikola	KLIMA Matej	ERMAKOV Aleksandr	KRSTEVSKI Goran	BOOMHOUWER Jeffrey	SEVALJEVIC Vasko	GURKOVSKY Pavlo	PRZYBYLSKI Rafal	VRANJES Vladimir		MAROS Luka	POLITERS Egils
13	GÓMEZ ABELLÓ Aleix	RAVNIC Valentino	BERGERUD Torbjoern Sittrup	OVNICEK Rok	KASTENING Timo	GOMES Andre	NIELSEN Jesper	FEKETE Balint	THRASTARSON Haukur	HANSEN Johan a Plogv	ZELENOVIC Nemanja	GUIGOU Michaël		KARALEK Artsem	WAGNER Tobias	SOLAK Dominik	ANDREEV Pavel	POPOVSKI Martin	JERRY Ephrahim	LASICA Marko	ZHUKOV Stanislav	BONDZIOR Krystian	MALINOVIC Dejan		TOMINEC Nik	KLESNIKS Evars
14	ARIÑO BENGOECHEA Aitor	SIPIC Marin	GULLIKSEN Kevin Maageroe	BOMBAC Dean	SCHMIDT David	ANTUNES Fabio	EKDAHL DU RIETZ Kim	UBORNYAK David	JONSSON Elvar Örn	DAMGAARD NIELSEN Michael	MARSENIC Mijajlo	FABREGAS Ludovic		VAILUPAU Mikita	JOCHMANN Jakob	MUBENZEM Dieudonne	KIREEV Victor	PESHEVSKI Zharko	EIJLERS Gerrie	ANDJELIC Bozo	OSTROUSHKO Vladislav	DAWYDZIK Dawid	HAMIDOVIC Dino		GERBL Maximilian	LEJA Rihards
15	GUARDIOLA VILLAPLANA Gedeon	SEGO Marin	CHRISTOFFERSEN BLONZ Alexander	MACKOVSEK Borut	ZIEKER Patrick	FRADE Luis	CHRINTZ Valter	HORNYÁK Péter	KRISTJÁNSSON Viggo	ANDERSSON Lasse Bredekjaer	CUPARA Vladimir	DIPANDA Adrien		BOKHAN Viachaslau	HUTECEK Lukas	ZEMAN Štepán	ZHITNIKOV Dmitry	MADZOVSKI Bojan	BAIJENS Dani	GRBOVIC Nemanja	KOMOK Gennadiy	CHRAPKOWSKI Piotr	PREDRAGOVIC Srdjan		BRINGOLF Aurel	TUMINSKIS Austris
16	DUJSHEBAEV DOBICHEVAEVA Daniel	ASANIN Matej	RÖD Magnus Abelvik	KASTELIC Urh	DRUX Paul	MAGALHÃES Fabio	NILSSON Lukas	TÓTH Ádám István	SMARASON Janus Dadi	HOLM Jacob Tandrup	IVANISEVIC Tibor	PORTE Valentin		GAYDUCHENKO Vadim	SANTOS Raul	MOJZIS Jan	KOSOROTOV Sergei Mark	MISHEVSKI Marko	REMER Tim	LIPOVINA Vladan	ILCHENKO Dmytro	MORAWSKI Adam	VEGAR Marin		MILOSEVIC Alen	PAVLOVICS Janis
% left-handed	0.25	0.1875	0.375	0.25	0.25	0.1875	0.1875	0.3125	0.25	0.1875	0.25	0.375		0.1875	0.3125	0.25	0.125	0.25	0.3125	0.3125	0.1875	0.25	0.25		0.25	0.3125
2018	Spain	Croatia	Norway	Slovenia	Germany		Sweden	Hungary	Iceland	Denmark	Serbia	France		Belarus	Austria	Czech Republic		Macedonia		Montenegro
1	GURBINDO MARTINEZ Eduardo	STEVANOVIC Ivan	SAGOSEN Sander	SKOK Matevz	GENSHEIMER Uwe		HENNINGSSON Philip	SCHUCH Istvan Timuzsin	GUSTAVSSON Björgvin Pall	LANDIN JACOBSEN Niklas	SESUM Zarko	DUMOULIN Cyril		KULESH Uladzislau	BAUER Thomas	MRKVA Tomas		MITREVSKI Nikola		MIJATOVIC Rade
2	FERNANDEZ PEREZ Angel	MIHIC Lovro	MYRHOL Bjarte Hakon	BLAGOTINSEK Blaz	LEMKE Finn		JEPPSSON Simon	JUHASZ Adam	KRISTJANSSON Kari Kristjan	KIRKELOKKE Niclas Vest	VUJIC Stefan	REMILI Nedim		BABICHEV Maxim	HERMANN Alexander	HRSTKA Jakub		MANASKOV Dejan		CAVOR Stefan
3	RIVERA FOLCH Valero	DUVNJAK Domagoj	JAKOBSEN Henrik	VERDINEK Matic	WIENCEK Patrick		DARJ Max	CSASZAR Gabor	PALMARSSON Aron	LANDIN JACOBSEN Magnus	DJUKIC Darko	MEM Dika		SHYLOVICH Siarhei	ZIURA Vytautas	BECVAR Roman		VELKOVSKI Martin		LAZOVIC Vuk
4	ENTRERRIOS RODRIGUEZ Raul	STEPANCIC Luka	TÖNNESEN Kent Robin	HENINGMAN Nik	REICHMANN Tobias		TOLLBRING Jerry	BALOGH Zsolt	KARASON Runar	MORTENSEN Casper Ulrich	BELJANSKI Bojan	GERARD Vincent		PUKHOUSKI Barys	BOZOVIC Janko	LANDA Jan		STOILOV Stojanche		PEJOVIC Zarko
5	DUJSHEBAEV DOVICHEBAEVA Alex	KOPLJAR Marko	CHRISTENSEN Espen	MARGUC Gasper	HEINEVETTER Silvio		EKBERG Niclas	LIGETVARI Patrik	HALLGRIMSSON Asgeir Örn	LAUGE SCHMIDT Rasmus	NENADIC Petar	KARABATIC Nikola		MATSKEVICH Ivan	FRIMMEL Sebastian	HORAK Pavel		LAZAROV Kiril		MARKOVIC Igor
6	SARMIENTO MELIAN Daniel	VORI Igor	JOENDAL Magnus	MARGUC Gal	PEKELER Hendrik		PALICKA Andreas	MIKLER Roland	ATLASON Arnor	ZACHARIASSEN Anders	RADIVOJEVIC Bogdan	MAHE Kentin		RUTENKA Dzianis	RANFTL Julian	KOTRC Milan		PRIBAK Nemanja		MIJUSKOVIC Mile
7	AGUINAGALDE AKIZU Julen	GOJUN Jakov	BJÖRNSEN Kristian	KAVTICNIK Vid	WEINHOLD Steffen		WANNE Hampus	VILOVSKI Uros	ELISSON Bjarki Mar	GREEN KREJBERG Jannick	MARKOVIC Dobrivoje	N'GUESSAN Timothey		SALDATSENKA Viachaslau	WEBER Robert	GALIA Martin		JONOVSKI Ace		VUJOVIC Milos
8	CAÑELLAS REIXACH Joan	HORVAT Zlatko	GULLERUD Magnus	JANC Blaz	WEBER Philipp		PETTERSSON Fredric	HORNYAK Peter	SIGURDSSON Gudjon Valur	SVAN Lasse	DJORDJIC Petar	ABALO Luc		KARVATSKI Artur	ZEINER Gerald	KASPAREK Stanislav		TALESKI Filip		RADOJEVIC Igor
9	MORROS DE ARGILA Viran	KARACIC Igor	SÖRHEIM Göran	CINGESAR Darko	FÄTH Steffen		JAKOBSSON Johan Mikael	JAMALI Moorchegani Iman	GISLASON Ymir Örn	LINDBERG Hans	ILIC Nemanja	SORHAINDO Cedric		YURYNOK Andrei	SCHOPF Tobias	STEHLIK Jan		MIRKULOVSKI Filip		SIMOVIC Nebojsa
10	GUARDIOLA VILLAPLANA Gedeon	MANDALINIC Stipe	JOHANNESSEN Goeran Soegaard	ZARABEC Miha	GROETZKI Patrick		APPELGREN Mikael	BORBELY Adam	GUDMUNDSSON Olafur Andres	TOFT HANSEN Rene	JOVANOVIC Milan	GUIGOU Michael		BARANAU Maksim	JELINEK Wilhelm	PETROVSKY Leos		MARKOSKI Velko		VUJOVIC Stevan
11	PEREZ DE VARGAS MORENO	ALILOVIC Mirko	O'SULLIVAN Christian	BEZJAK Marko	HÄFNER Kai		LAGERGREN Albin	BANHIDI Bence	MAGNUSSON Omar Ingi	MØLLGAARD JENSEN Henrik	ZELENOVIC Nemanja	AFGOUR Benjamin		PADASINAU Artsem	BILYK Nikola	ZDRAHALA Ondrej		RISTOVSKI Borko		SEVALJEVIC Vasko
12	CORRALES RODAL Rodrigo	STRLEK Manuel	TANGEN Eivind	GREBENC Jan	JAHNKE Maximilian		GOTTFRIDSSON Jim	SZÖLLÖSI Szabolcs	GUNNARSSON Arnor Tor	MENSAH LARSEN Mads	MARSENIC Mijajlo	CLAIRE Nicolas		KARALEK Artsem	WAGNER Tobias	CIP Tomas		MARKOSKI Nikola		BOZOVIC Milos
13	SOLE SALA Ferran	CUPIC Ivan	REINKIND Harald	ZABIC Igor	WOLFF Andreas		ARNESSON Linus	BARTOK Donat	BJÖRGVINSSON Agust Elí	TOFT HANSEN Henrik	VUJIN Marko	DIPANDA Adrien		TSITOU Aliaksandr	PILIPOVIC Kristian	SVITAK Jakub		KUZMANOVSKI Filip		LASICA Marko
14	BALAGUER ROMEU David	MUSA Zeljko	BERGERUD Torbjoern Sittrup	MACKOVSEK Borut	KÜHN Julius		ZACHRISSON Mattias	ANCSIN Gabor	ARNARSSON Arnar Freyr	HANSEN Mikkel	OBRADOVIC Nemanja	PORTE Valentin		BOKHAN Viachaslau	HERBURGER Lukas	MUBENZEM Dieudonne		GEORGIEVSKI Goce		ANDJELIC Bozo
15	FIGUERAS TREJO Adrian	MAMIC Marko	RÖD Magnus Abelvik	MLAKAR Ziga	KOHLBACHER Jannik		NIELSEN Jesper	BODO Richard	GUNNARSSON Bjarki Mar	OLSEN Morten	CUPARA Vladimir	TOURNAT Nicolas		HARBUZ Hleb	NEUHOLD Christoph	KASAL Michal		POPOVSKI Martin		GRBOVIC Nemanja
16	DUJSHEBAEV DOBICHEVAEVA Daniel	CINDRIC Luka	HANSEN Espen Lie	LESJAK Urban	DRUX Paul		NILSSON Lukas	LEKAI Mate	SMARASON Janus Dadi	DAMGAARD NIELSEN Michael	IVANISEVIC Tibor	CAUCHETEUX Raphael		GAYDUCHENKO Vadim	KIRVELIAVICIUS Romas	ZEMAN Stepan		PESHEVSKI Zharko		LIPOVINA Vladan
% left-handed	0.25	0.25	0.375	0.3125	0.25		0.25	0.25	0.25	0.1875	0.25	0.3125		0.25	0.1875	0.25		0.25		0.25
2016	Spain	Croatia	Norway	Slovenia	Germany		Sweden	Hungary	Iceland	Denmark	Serbia	France		Belarus			Russia	Macedonia		Montenegro		Poland
1	GURBINDO Eduardo	STEVANOVIC Ivan	SAGOSEN Sander	SKOK Matevz	SELLIN Johannes		ANDERSSON Mattias	BARTUCZ Laszlo	GUSTAVSSON Björgvin Pall	LANDIN JACOBSEN Niklas	DUKANOVIC Slavisa	REMILI Nedim		KISHOU Aliaksei			SHISHKAREV Daniil	MANASKOV Dejan		MIJATOVIC Rade		SZMAL Slawomir
2	MAQUEDA Jorge	MARIC Marino	KRISTENSEN Thomas	BLAGOTINSEK Blaz	LEMKE Finn		OLSSON Markus	SCHUCH Timuzsin	SVAVARSSON Vignir	LYNGGAARD Alexander	PUSICA Miljan	NYOKAS Guy Olivier		BROUKA Ivan			KOVALEV Dmitry	STOILOV Stojanche		LEKOVIC Bozidar		LIJEWSKI Krzysztof
3	TOMAS Victor	DUVNJAK Domagoj	HYKKERUD Joakim	MARGUC Gasper	REICHMANN Tobias		KÄLLMAN Jonas	PASZTOR Akos	KRISTJANSSON Kari Kristjan	CHRISTIANSEN Mads	SESUM Zarko	NARCISSE Daniel		KULESH Uladzislau			CHERNOIVANOV Aleksandr	LAZAROV Kiril		MELIC Fahrudin		KRAJEWSKI Przemyslaw
4	ENTRERRIOS Raul	KOPLJAR Marko	MYRHOL Bjarte	KAVTICNIK Vid	WIEDE Fabian		EKBERG Niclas	IVANCSIK Gergö	PALMARSSON Aron	MENSAH LARSEN Mads	NIKCEVIC Ivan	HONRUBIA Samuel		BABICHEV Maxim			ATMAN Pavel	MITKOV Vlatko		MILASEVIC Mirko		BIELECKI Karol
5	AGUINAGALDE Julen	GOJUN Jakov	OVERBY Petter	SKOF Gorazd	PEKELER Hendrik		NILSSON Lukas	GAZDAG Tibor	KARASON Runar	MORTENSEN Casper U.	MARJANOVIC Filip	GERARD Vincent		KHADKEVICH Aliaksei			BOGDANOV Vadim	JONOVSKI Ace		CAVOR Stefan		WISNIEWSKI Adam
6	UGALDE Cristian	HORVAT Zlatko	MAMELUND Erlend	CINGESAR Darko	LICHTLEIN Carsten		KONRADSSON Jesper	HORNYAK Peter	HALLGRIMSSON Asgeir Örn	EGGERT MAGNUSSEN Anders	DUKIC Darko	KARABATIC Nikola		ZAITSAU Viktar			GORBOK Sergey	DUPJACHANEC Daniel		ANDELIC Bozo		JURECKI Bartosz
7	STERBIK Arpad	KARACIC Igor	EREVIK Ole	SKUBE Sebastian	WEINHOLD Steffen		KARLSSON Tobias	MIKLER Roland	ATLASON Arnor	LAUGE SCHMIDT Rasmus	STANIC Darko	MAHE Kentin		PUKHOUSKI Barys			CHIPURIN Mikhail	MIRKULOVSKI Filip		MIJUSKOVIC Mile		JURECKI Michal
8	CANELLAS Joan	ALILOVIC Mirko	TONNESEN Kent Robin	POTEKO Vid	STROBEL Martin		JAKOBSSON Johan	NAGY Kornel	SIGURDSSON Gudjon Valur	NODDESBO Jesper	NENADIC Petar	OMEYER Thierry		RUTENKA Siarhei			SHELMENKO Sergei	MARKOSKI Velko		RADOVIC Mirko		WYSZOMIRSKI Piotr
9	MORROS DE ARGILA Viran	STRLEK Manuel	CHRISTENSEN Espen	MIKLAVCIC David	SCHMIDT Erik		APPELGREN Mikael	NAGY Laszlo	GUDJONSSON Snorri Steinn	SVAN HANSEN Lasse	BOSKOVIC Novak	ABALO Luc S		SALDATSENKA Viachaslau			DASHKO Ruslan	RISTOVSKI Borko		VUJOVIC Milos		KONITZ Bartosz
10	GARCIA Antonio Jesus	CUPIC Ivan	JONDAL Magnus	ZVIZEJ Luka	FÄTH Steffen		PETERSEN Fredrik	JAMALI Iman Moorchegani	EDVARDSSON Aron Rafn	LINDBERG Hans	RNIC Momir	SORHAINDO Cedric		NIKULENKAU Dzmitry			BUZMAKOV Valentin	MARKOSKI Nikola		KANKARAS Branko		GRABARCZYK Piotr
11	RIVERA Valero	KOVACEVIC Antonijo	BJORNSEN Kristian	GABER Matej	WOLFF Andreas		STENMALM Philip	FALUVEGI Rudolf	GUNNARSSON Arnor Thor	MOLLER Kevin	BELJANSKI Bojan	GUIGOU Michael		SHYLOVICH Siarhei			DIBIROV Timur	MOJSOVSKI Naumche		SEVALJEVIC Vasko		GLINSKI Rafal
12	GUARDIOLA Gedeon	MAMIC Marko	LINDBOE Andre	ZORMAN Uros	DAHMKE Rune		CEDERHOLM Andreas	ZUBAI Szabolcs	PETERSSON Alexander	MOLLGAARD JENSEN Henrik	ZELENOVIC Nemanja	KARABATIC Luka		PATSYKAILIK Aliaksandr			SOROKA Igor	PRIBAK Nemanja		RISTANOVIC Radivoje		SYPRZAK Kamil
13	PEREZ DE VARGAS Gonzalo	SEBETIC Luka	GULLERUD Magnus	ZARABEC Miha	ERNST Simon		ÖSTLUND Viktor	BANHIDI Bence	GUNNARSSON Robert	TOFT HANSEN Henrik	ABUTOVIC Ilija	FABREGAS Ludovic		YURYNOK Andrei			TCELISHCHEV Lev	GEORGIEVSKI Goce		PETRICEVIC Bogdan		DASZEK Michal
14	MINDEGIA Niko	SLISKOVIC Ivan	O`SULLIVAN Christian	BOMBAC Dean	PIECZKOWSKI Niclas		ZACHRISSON Mattias	BORSOS Tamas	SIGURMANNSSON Stefan Rafn	HANSEN Mikkel	MARSENIC Mijajlo	DEROT Theo		BARANAU Maksim			KIREEV Victor	OJLESKI Goce		BOROZAN Vuko		LUCAK Jakub
15	DEL ARCO Juan	CINDRIC Luka	REINKIND Harald	GAJIC Dragan	DISSINGER Christian		NILSSON Andreas	ANCSIN Gabor	GUNNARSSON Bjarki Mar	DAMGAARD NIELSEN Michael	ORBOVIC Milos	PORTE Valentin		PRAKAPENIA Anton			ZHITNIKOV Dmitrii	KUZMANOVSKI Filip		GRBOVIC Nemanja		SZYBA Michal
16	DUJSHEBAEV Alex	BROZOVIC Ilija	HANSEN Espen Lie	MACKOVSEK Borut	KOHLBACHER Jannik		NIELSEN Jesper	BODO Richard	HELGASON Gudmundur Holmar	BALLING CHRISTENSEN Peter	ELEZOVIC Uros	KOUNKOUD Benoit		TSITOU Aliaksandr			KALARASH Gleb	PESHEVSKI Zharko		LIPOVINA Vladan		CHRAPKOWSKI Piotr
% left-handed	0.25	0.25	0.25	0.25	0.25		0.25	0.25	0.25	0.3125	0.25	0.25		0.125			0.3125	0.25		0.25		0.25
	Total 5 of left-handed players	0.246875
